1 **Title**

2 **Allele mining unlocks the identification of RYMV resistance genes and**  
3 **alleles in African cultivated rice**

4

5 **Authors**

6 Hélène Pidon, Sophie Chéron, Alain Ghesquière, Laurence Albar

7

8 **Authors affiliations**

9 DIADE, Univ. Montpellier, IRD, Montpellier, France

10 Present address HP: Leibniz Institute of Plant Genetics and Crop Plant Research (IPK) Gatersleben,  
11 Seeland, Germany

12

13 Corresponding author: L. Albar

14

15

16

17

18

19

20

21

22

23

24

25

26

27 **Abstract**

28 **Background:**

29 *Rice yellow mosaic virus* (RYMV) is a major rice pathogen in Africa. Three resistance genes, i.e.  
30 *RYMV1*, *RYMV2* and *RYMV3*, have been previously described. *RYMV1* encodes the translation  
31 initiation factor eIF(iso)4G-1 and the best candidate genes for *RYMV2* and *RYMV3* encode a homolog  
32 of an *Arabidopsis* nucleoporin (CPR5) and a nucleotide-binding domain and leucine-rich repeat  
33 containing domain (NLR) protein, respectively. High resistance is very uncommon in Asian cultivated  
34 rice (*Oryza sativa*), with only two highly resistant accessions identified so far, but it is more frequent  
35 in African cultivated rice (*Oryza glaberrima*).

36 **Results:**

37 Here we report the findings of a resistance survey in a reference collection of 268 *O. glaberrima*  
38 accessions. A total of 40 resistant accessions were found, thus confirming the high frequency of  
39 resistance to RYMV in this species. We analysed the variability of resistance genes or candidate  
40 genes in this collection based on high-depth Illumina data or Sanger sequencing. Alleles previously  
41 shown to be associated with resistance were observed in 31 resistant accessions but not in any  
42 susceptible ones. Five original alleles with a frameshift or untimely stop codon in the candidate gene  
43 for *RYMV2* were also identified in resistant accessions. A genetic analysis revealed that these alleles,  
44 as well as T-DNA insertions in the candidate gene, were responsible of RYMV resistance. All 40  
45 resistant accessions were ultimately linked to a validated or candidate resistance allele at one of the  
46 three resistance genes to RYMV.

47 **Conclusion:**

48 This study demonstrated that the *RYMV2* resistance gene is homologous to the *Arabidopsis CPR5*  
49 gene and revealed five new resistance alleles at this locus. It also confirmed the close association  
50 between resistance and an amino-acid substitution in the leucine-rich repeat of the NLR candidate for  
51 *RYMV3*. We also provide an extensive overview of the genetic diversity of resistance to RYMV in the  
52 *O. glaberrima* species, while underlining the contrasted pattern of diversity between *O. glaberrima*  
53 and *O. sativa* for this trait. The different resistance genes and alleles will be instrumental in breeding  
54 varieties with sustainable field resistance to RYMV.

55 **Key words**

56 rice, *Oryza glaberrima*, RYMV, resistance gene, CPR5

57

58 **Background**

59 *Oryza sativa*, domesticated in Asia, is cropped in almost all rice-growing areas worldwide. However,  
60 an independent rice domestication process occurred in Africa, which gave rise to the cultivated  
61 species *Oryza glaberrima* [1,2]. The more productive *O. sativa* species was introduced in East Africa  
62 more than 1,000 years ago and in West Africa in the 16th century, and has progressively supplanted  
63 *O. glaberrima*. Breeding initiatives over the last 60 years have essentially concerned *O. sativa*  
64 varieties and have further widened the gap in yield potential between varieties of the two species.  
65 Nonetheless, *O. glaberrima* has specific traits of interest and adaptation to local stresses, such as  
66 drought, iron toxicity, infertile soils and weed competition [3,4]. This rich source of gene diversity is  
67 of substantial breeding interest to increase rice yield in a setting of global warming and reduced  
68 inputs. *O. glaberrima* was thus introduced in breeding programs [5,6] leading for instance to the New  
69 Rice for Africa (NERICA) varieties, that resulted from *O. sativa* x *O. glaberrima* interspecific crosses  
70 and were successfully disseminated in the 2000s [7,8].

71 The *Rice yellow mottle virus* (RYMV) is endemic to Africa and responsible for significant rice crop  
72 losses in irrigated or lowland areas [9]. High resistance appears to be very uncommon in *O. sativa*,  
73 with only two highly resistant varieties identified so far [10,11], whereas 31 highly resistant *O.*  
74 *glaberrima* accessions have been reported [12,13]. Moreover, while the two *O. sativa* resistant  
75 varieties share the same allele of the *RYMV1* resistance gene, which encodes a translation initiation  
76 factor, at least three different *RYMV1* resistance alleles evolved independently in *O. glaberrima*  
77 [12,14]. These results suggest that *O. glaberrima* diversity for this trait would be particularly useful  
78 for rice breeding.

79 Two additional resistance genes, i.e. *RYMV2* and *RYMV3*, have been mapped in *O. glaberrima*  
80 species. *RYMV2*-mediated resistance is associated with a 1 bp deletion, leading to a null allele of an  
81 homolog of the *Arabidopsis constitutive expression of pathogenesis related protein-5* (*CPR5*)

82 nucleoporin gene in both a bi-parental mapping population and a collection of *O. glaberrima*  
83 accessions [13]. In *Arabidopsis*, the *CPR5* nucleoporin gene is involved in the regulation of defense  
84 mechanisms and senescence [15,16]. Considering the sequence homology and in line with previous  
85 studies [13,17], the candidate gene for *RYMV2* is hereafter referred to as *CPR5-I*, although its  
86 nucleoporin role and involvement in defense mechanisms has yet to be documented in rice. More  
87 recently, a gene of the nucleotide binding domain and leucine-rich repeat gene (NLR) superfamily  
88 was pinpointed as the best candidate for the *RYMV3* dominant resistance gene [18]. This gene is  
89 hereafter referred to as *NLR<sub>RYMV3</sub>*. Resistance is associated with a single amino-acid substitution in the  
90 leucine-rich repeat (LRR) domain of the protein, which is known to be involved in the pathogen  
91 recognition specificity.

92 Here we describe the diversity of RYMV resistance genes or candidates in one of the most  
93 documented *O. glaberrima* collections, which covers the geographical distribution of the species and  
94 includes 165 fully sequenced accessions [19,20]. We also validated the candidate gene for *RYMV2*  
95 using natural variants identified in *O. glaberrima* diversity and *O. sativa* T-DNA mutants.

96

## 97 **Results**

### 98 **Screening for resistance to RYMV in a collection of *O. glaberrima* accessions**

99 Thiemele et al. [12] and Orjuela et al. [13] screened 120 accessions of the *O. glaberrima* collection  
100 described in Orjuela et al. [19] for resistance to RYMV and found 31 highly resistant accessions. In  
101 the present study, these 31 accessions and 148 additional ones from the same collection were  
102 phenotyped for resistance by double antibody sandwich enzyme-linked immunosorbent assay (DAS-  
103 ELISA) on a set of four plants per accession. The same virus isolate as that reported in Thiemele et al.  
104 [12] and Orjuela et al. [13] was used. Of the 31 accessions previously reported as being resistant, we  
105 confirmed the resistance of 28, while three were susceptible, presumably because of between seed  
106 stocks heterogeneity. All four plants of most of the 148 newly tested accessions were clearly  
107 susceptible. However, highly resistant plants were observed in 12 accessions for which the high  
108 resistance phenotype was confirmed in additional plants when seeds were available (Table 1). For

109 eight of those, up to a third of the plants multiplied the virus, suggesting incomplete resistance or  
110 possible resistance-breaking events, as previously reported [17,18,21]. However, the rate of  
111 susceptible vs. resistant plants was not significantly different than observed on the Tog7291 accession  
112 carrying the *RYMV2* major gene (Fisher exact test,  $p>0.05$ ) and these accessions were thus considered  
113 resistant. Finally, the accessions identified as being resistant in this study were: Og26, Og111, Og133,  
114 Og183, Og213, Og256, Og406, Og423, Og447, Og452, Og491 and Og498 (Table 1; Additional file 1:  
115 Table S1). A total of 40 accessions out of 268 were therefore highly resistant to the BF1 isolate of  
116 RYMV.

117

118 **Table 1. Phenotyping of *O. glaberrima* accessions for RYMV resistance.** Only  
119 accessions identified as resistant in this study are listed in this table. Resistance was  
120 evaluated based on ELISA tests performed on individual plants after mechanical inoculation  
121 with the BF1 isolate of RYMV. The first screening was performed on a set of four plants and  
122 confirmed, when seeds were available, in additional screening experiments. Only accessions  
123 for which high resistance was observed are listed. Tog5681 and Tog7291, carrying resistance  
124 alleles on *RYMV1* and *RYMV2* genes, respectively, were used as resistance controls and  
125 Og82, Og431 and CG14 were used as susceptible controls. The total number of resistant and  
126 susceptible plants and the percentage of resistant plants are indicated.

| Accessions           | Resistant | Susceptible | Resistance rate (%) |
|----------------------|-----------|-------------|---------------------|
| Susceptible controls | 2         | 22          | 8                   |
| Tog5681              | 8         | 0           | 100                 |
| Tog7291              | 10        | 2           | 83                  |
| Og26                 | 18        | 0           | 100                 |
| Og111                | 12        | 0           | 100                 |
| Og133                | 11        | 6           | 65                  |
| Og183                | 16        | 2           | 89                  |
| Og213                | 9         | 4           | 69                  |
| Og256                | 14        | 4           | 78                  |
| Og406                | 15        | 1           | 94                  |
| Og423                | 4         | 0           | 100                 |
| Og447                | 14        | 2           | 87                  |
| Og452                | 16        | 0           | 100                 |
| Og491                | 17        | 5           | 77                  |
| Og498                | 16        | 2           | 89                  |

127

## 128 **Allele mining in RYMV resistance genes or candidates**

129 Among resistant *O. glaberrima* accessions, previous results indicated that 12 have a resistance allele  
130 on the *RYMV1* gene [12], 7 have an allele associated with *RYMV2*-mediated resistance on the *CPR5-1*  
131 gene [13], 1 has a resistance allele on *RYMV3*, for which *NLR<sub>RYMV3</sub>* is a candidate [18], while the  
132 Tog5672 accession carries a resistance allele on both *RYMV1* and *RYMV3* [18]. The genes or alleles  
133 responsible for resistance in the 19 remaining accessions were unknown.

134 Polymorphisms in the *RYMV1* gene, and in the *RYMV2* and *RYMV3* candidate genes, the *CPR5-1*  
135 gene and *NLR<sub>RYMV3</sub>*, respectively, were analyzed in 165 accessions for which the full genome sequence  
136 was available [1,20,22]. For the nine resistant accessions for which the full genome sequence was not  
137 available, the partial or complete sequence of the target genes were obtained from Thiemele et al. [12]  
138 or by Sanger sequencing of polymerase chain reaction (PCR) fragments.

139

## 140 **Allele mining in *RYMV1***

141 A total of ten single nucleotide polymorphisms (SNPs) or small insertions/deletions (indels), defining  
142 nine different haplotypes, were detected in the *RYMV1* gene (Additional file 1: Table S2). The three  
143 most frequent haplotypes at the nucleotidic level represented 83% of the accessions and corresponded  
144 to the protein variant of the CG14 accession, while the others were detected in less than 5% of the  
145 accessions. Five mutations – three SNPs and two indels – were located in the exons and all resulted in  
146 amino-acid changes (Figure 1A). One of them that caused a single amino-acid substitution (P541L)  
147 was present in susceptible accessions. The others, which were previously described as characterizing  
148 *rymv1-3* (R322\_D324del, S576N), *rymv1-4* (E321K) and *rymv1-5* (K312\_G315delinsN) resistance  
149 alleles [12,14], were associated with resistance in the full collection. Fifteen resistant accessions  
150 carried those resistance alleles (Table 2; Additional file 1: Table S1), including two accessions  
151 identified as resistant in this study, Og208 and Og423, which carried alleles *rymv1-3* and *rymv1-4*,  
152 respectively.

153  
154

**Table 2. List of the resistant accessions and their alleles on the resistance genes or candidates.** Only alleles associated with resistance are indicated.

| ID in (19) | Alternate ID        | Allele on <i>RYMV1</i> | Allele on <i>RYMV2</i><br>candidate | Allele on <i>RYMV3</i><br>candidate |
|------------|---------------------|------------------------|-------------------------------------|-------------------------------------|
| Oq8        | Toq5321             | <i>rymv1-3</i>         |                                     |                                     |
| Oq13       | Toq5418             | <i>rymv1-3</i>         |                                     |                                     |
| Oq20       | Toq5438             | <i>rymv1-4</i>         |                                     | <i>NLR<sub>RYMV3-X</sub></i>        |
| Oq24       | Toq5463             | <i>rymv1-4</i>         |                                     |                                     |
| Oq26       | Toq5474             |                        |                                     | <i>Nlr<sub>RYMV3-R1</sub></i>       |
| Oq28       | Toq5486             | <i>rymv1-3</i>         |                                     |                                     |
| Oq36       | Toq5556             | <i>rymv1-3</i>         |                                     | <i>NLR<sub>RYMV3-X</sub></i>        |
| Oq44       | Toq5672             | <i>rymv1-4</i>         |                                     | <i>Nlr<sub>RYMV3-R1</sub></i>       |
| Oq46       | Toq5674             | <i>rymv1-5</i>         |                                     |                                     |
| Oq49       | Toq5681             | <i>rymv1-3</i>         |                                     |                                     |
| Oq87       | Toq6220, IRGC112577 |                        | <i>rymv2-R1</i>                     | <i>NLR<sub>RYMV3-V</sub></i>        |
| Oq103      | Toq6698             |                        | <i>rymv2-R1</i>                     | <i>NLR<sub>RYMV3-V</sub></i>        |
| Oq111      | Toq5286             |                        |                                     | <i>Nlr<sub>RYMV3-R1</sub></i>       |
| Oq126      | Toq5747             |                        |                                     | <i>Nlr<sub>RYMV3-R1</sub></i>       |
| Oq133      | RAM 131             |                        | <i>rymv2-R2</i>                     |                                     |
| Oq150      | Toq7206, IG38       |                        | <i>rymv2-R1</i>                     |                                     |
| Oq151      | Toq14367            |                        | <i>rymv2-R4</i>                     |                                     |
| Oq152      | Toq13943            |                        |                                     |                                     |
| Oq153      | Toq13709            |                        | <i>rymv2-R4</i>                     |                                     |
| Oq160      | Toq7235, IRGC103549 |                        | <i>rymv2-R1</i>                     |                                     |
| Oq161      | Toq10434            |                        | <i>rymv2-R1</i>                     |                                     |
| Oq163      | Toq12086            |                        |                                     | <i>Nlr<sub>RYMV3-R1</sub></i>       |
| Oq164      | Toq12160            |                        |                                     | <i>Nlr<sub>RYMV3-R1</sub></i>       |
| Oq165      | Toq12188            | <i>rymv1-4</i>         |                                     |                                     |
| Oq166      | Toq12249            | <i>rymv1-3</i>         |                                     |                                     |
| Oq172      | Toq7291             |                        | <i>rymv2-R1</i>                     |                                     |
| Oq183      | Toq7456             |                        | <i>rymv2-R3</i>                     |                                     |
| Oq186      | Toq8049             | <i>rymv1-3</i>         |                                     |                                     |
| Oq207      | Toq12386            | <i>rymv1-3</i>         |                                     |                                     |
| Oq208      | Toq12387            | <i>rymv1-3</i>         |                                     |                                     |
| Oq213      | Toq12401            |                        | <i>rymv2-R4</i>                     |                                     |
| Oq256      | Toq14361            |                        | <i>rymv2-R6</i>                     |                                     |
| Oq406      | Toq7197             |                        | <i>rymv2-R4</i>                     |                                     |
| Oq411      | Toq7202, IG35       |                        | <i>rymv2-R1</i>                     |                                     |
| Oq423      | IRGC104018          | <i>rymv1-4</i>         |                                     |                                     |
| Oq447      | 1LG104              |                        | <i>rymv2-R2</i>                     |                                     |
| Oq452      | 3LG117B             |                        | <i>rymv2-R2</i>                     |                                     |
| Oq491      | OG1                 |                        | <i>rymv2-R5</i>                     |                                     |
| Oq498      | SG329               |                        | <i>rymv2-R4</i>                     |                                     |
| Oq6 2      | Toq5307             |                        |                                     | <i>Nlr<sub>RYMV3-R1</sub></i>       |

155  
156

157 **Allele mining in *CPR5-1***

158 In the *CPR5-1* gene, 12 polymorphisms were detected at the nucleotidic level based on genomic data  
159 from Cubry et al. [20] (Additional file 1: Table S3). However, the filters used in this analysis  
160 hampered detection of the 1 bp-deletion on codon 17 that characterized the allele of the resistant  
161 Tog7291 accession [13] because it is located in an artificially created SNP-cluster, probably due to a  
162 GCC rich region [23]. Nevertheless, all accessions of the collection had been previously genotyped at  
163 this position based on a CAPS marker [13]. Moreover, the deletion was confirmed by manual curation  
164 of the read alignment data (BAM file) of the Tog7291 accession. The 13 polymorphisms in the  
165 *CPR5-1* gene defined eight haplotypes at the nucleotide level and eight protein variants (Figure 1B;  
166 Additional file 1: Table S3). The CG14 reference haplotype was observed in 89% of the accessions.  
167 Six haplotypes were characterized by frameshifts (A18fs, G75fs, N229fs, A390fs) or an untimely stop  
168 codon (R222\*, L485\*), leading to truncated forms of the protein, while conserving from 3 to 93% of  
169 the protein sequence. Interestingly, these haplotypes concerned 19 accessions that were all highly  
170 resistant to RYMV (Table 2; Additional file 1: Table S1), with the most frequent being the Tog7291  
171 haplotype that was previously described in seven accessions [13], while the others were less frequent  
172 haplotypes that were found in one to three accessions. Finally, four RYMV-susceptible accessions  
173 (Og186, Og426, Og459 and Og89) shared the same haplotype characterized by three SNPs in the  
174 introns and three SNPs causing amino-acid substitutions (T310K, L396F, N433D).

175

176 **Allele mining in *NLR<sub>RYMV3</sub>***

177 The variability in *NLR<sub>RYMV3</sub>*, with 66 polymorphisms at the nucleotidic level, was far greater than the  
178 variability observed in *RYMV1* and *CPR5-1* (Additional file 1: Table S4). Yet, the polymorphisms  
179 identified in the first intron were probably underestimated because of the marked differences between  
180 the Nipponbare sequence used as mapping reference and the CG14 sequence, which probably  
181 hampered correct mapping and extensive SNP calling in this region. Eleven haplotypes were detected,  
182 with the CG14 haplotype being found in 71.5% of the accessions. Forty-nine mutations were located  
183 in exons, including 35 that were non-synonymous (Figure 1.C). These mutations defined ten protein  
184 variants, three of which were specific to resistant accessions (Table2; Additional file 1: Table S1):



185 two displayed a single amino-acid substitution compared to the reference allele (K779R described in  
186 Pidon et al. [18], and A823V), while the third one showed a frameshift in the LRR domain (S672fs)  
187 and 11 amino-acid substitutions. The K779R mutation was observed in the two accessions – Tog5307  
188 and Tog5672 – known to carry a resistance allele of *RYMV3* [18], and five that displayed a resistant  
189 phenotype but did not carry resistance specific alleles on *RYMV1* or *CPR5-1*, which suggested that  
190 their resistance may be associated with the K779R mutation. Conversely, accessions carrying the  
191 A823V mutation (Og20, Og36) also had known resistance alleles of *RYMV1* (*rymv1-4* and *rymv1-3*,  
192 respectively), and accessions carrying the S672fs mutation (Og87, Og103) had a *CPR5-1* allele  
193 associated with resistance.

194 Ultimately, all resistant accessions described in the *O. glaberrima* collection carried an allele  
195 associated with resistance in at least one of the three analyzed genes (Table 2).

196

#### 197 **Comparison with *O. sativa***

198 Moreover, we looked for polymorphisms at *RYMV1*, *CPR5-1* and *NLR<sub>RYMV3</sub>* in *O. sativa* based on the  
199 SNP-Seek database [24], which pools genotyping data from the 3000 Rice Genomes Project [25].  
200 Seventeen non-synonymous mutations were identified in *RYMV1*. They resulted in amino-acid  
201 substitutions or small deletions, but only three occurred in the middle domain of the eukaryotic  
202 initiation factor 4G (MIF4G), where all mutations conferring resistance to RYMV were located  
203 (Additional file 1: Table S5). One of them (A303D) was present only in the few *O. glaberrima*  
204 accessions included in the 3000 Rice Genomes Project, as well as in all accessions from our *O.*  
205 *glaberrima* collection. This mutation was therefore considered to be specific to *O. glaberrima* and not  
206 associated with resistance to RYMV. The two others, i.e. K352R and P395S, were detected in four  
207 and ten accessions, respectively. While located in the MIF4G domain, they did not occur in the 15  
208 amino-acid region which was mutated in the resistance alleles described so far, but instead were  
209 detected at least 28 amino-acids downstream. Twenty-three non-synonymous mutations were detected  
210 in the *CPR5-1* gene (Additional file 1: Table S5). However, none of them led to an untimely stop  
211 codon or frameshift. Similarly to what we observed in our *O. glaberrima* dataset, *O. sativa* presented  
212 high variability at the *NLR<sub>RYMV3</sub>* locus, with 112 non-synonymous mutations (Additional file 1: Table

213 S5). Eight mutations were detected in 10.4% of the accessions and resulted in stop codons or  
214 frameshifts. The 104 others were in frame mutations, leading to amino-acid substitutions or single  
215 amino acid insertions or deletions in the protein. Interestingly, three *O. sativa* spp. *indica* accessions  
216 carried the K779R mutation associated with RYMV resistance in *O. glaberrima*. These accessions  
217 shared a very specific haplotype, with 27 additional uncommon non-synonymous mutations that  
218 differentiated them from both other *O. sativa* and *O. glaberrima* accessions.

219

## 220 **Loss-of-function mutations in the *CPR5-1* gene confer resistance to RYMV**

221 A genetic analysis was performed to check the association between the truncated CPR5-1 forms  
222 identified in *O. glaberrima* and RYMV resistance. Resistant Og256, Og213, Og491, Og133 and  
223 Og183 accessions, representing the different truncated forms of CPR5-1, were crossed with a  
224 susceptible *O. glaberrima* accession (Og82 or Og431) and with the resistant Tog7291 accession,  
225 whose resistance is controlled by *RYMV2* [13]. F2 seeds were obtained for all combinations except  
226 (Og183 x Tog7291), and at least 45 F2 plants per population were phenotyped for RYMV resistance.  
227 The resistance segregations noted in all populations developed with the susceptible Og82 or Og431  
228 accessions were in agreement with a 1R:3S segregation ratio (Table 3), indicating monogenic and  
229 recessive control of resistance. Genotyping on the *CPR5-1* gene was performed on a total of 281  
230 plants based on Sanger sequencing for the Og133-derived population and cleaved amplified  
231 polymorphic sequence (CAPS) or derived cleaved amplified polymorphic sequence (dCAPS) markers  
232 for all the other populations. Most of the plants homozygous for a truncated form of the protein were  
233 resistant (76 out of 79), while most of the others (200 out of 202) were susceptible, showing a close  
234 association between the *CPR5-1* allelic state and RYMV resistance. We hypothesized that the five  
235 plants that did not fit this pattern were misclassified, presumably because of lack of inoculation or  
236 resistance breakdown [17,18,21]. Besides, 256 F2 plants from populations developed with the  
237 resistant Tog7291 accession were resistant (Table 3), while a single one was susceptible. These results  
238 demonstrated that the different truncated forms of CPR5-1 were resistance alleles of the *RYMV2*  
239 recessive resistance gene.

240

241 **Table 3. Cosegregation of RYMV resistance and allelic state on *CPR5-1*.** F2 plants were  
 242 evaluated for RYMV resistance based on symptom observations. The phenotype is indicated  
 243 with R for resistant plants and S for susceptible ones. F2 plants derived from crosses with  
 244 Tog7291 were not genotyped. For other populations, genotyping on the *CPR5-1* gene was  
 245 generally performed on all plants with CAPS or dCAPS markers, except for the (Og133 x  
 246 Og431) population for which genotyping was based on Sanger sequencing and only performed  
 247 on a subset of 35 plants. The genotype is indicated as "*rymv2-Rx*" for plants homozygous for  
 248 alleles *rymv2-R2* to *-R6*, "*Rymv1-S1*" for plants homozygous for the *Rymv1-S1* allele, and Htz  
 249 for heterozygous plants.

| F2 population                                           | Phenotype and genotype |                 |           |                 |
|---------------------------------------------------------|------------------------|-----------------|-----------|-----------------|
|                                                         | Total                  | <i>rymv2-Rx</i> | Htz       | <i>Rymv2-S1</i> |
| Og133 ( <i>rymv2-R2</i> ) x Og431 ( <i>Rymv2-S1</i> )   | 11 R, 50S              | 10 R            | 22 S      | 3 S             |
| Og133 ( <i>rymv2-R2</i> ) x Tog7291 ( <i>rymv2-R1</i> ) | 55 R, 1S               |                 |           |                 |
| Og183 ( <i>rymv2-R3</i> ) x Og82 ( <i>Rymv2-S1</i> )    | 14 R, 36 S             | 14 R            | 26 S      | 10 S            |
| Og213 ( <i>rymv2-R4</i> ) x Og82 ( <i>Rymv2-S1</i> )    | 13 R, 42 S             | 13 R            | 31 S      | 11 S            |
| Og213 ( <i>rymv2-R4</i> ) x Tog7291 ( <i>rymv2-R1</i> ) | 100 R                  |                 |           |                 |
| Og491 ( <i>rymv2-R5</i> ) x Og431 ( <i>Rymv2-S1</i> )   | 24 R, 47 S             | 21 R            | 3 R, 30 S | 17 S            |
| Og491 ( <i>rymv2-R5</i> ) x Tog7291 ( <i>rymv2-R1</i> ) | 56 R                   |                 |           |                 |
| Og256 ( <i>rymv2-R6</i> ) x Og82 ( <i>Rymv2-S1</i> )    | 18 R, 52 S             | 18 R, 2S        | 37 S      | 13 S            |
| Og256 ( <i>rymv2-R6</i> ) x Tog7291 ( <i>rymv2-R1</i> ) | 45 R                   |                 |           |                 |

250

251

252 In addition, *O. sativa* lines mutated in the *CPR5-1* gene were characterized. T-DNA insertional  
 253 mutant lines tagged in the *CPR5-1* gene were identified by searching the flanking sequence database  
 254 [26] of the mutant library developed by Jeon et al. [27] and Jeong et al. [28]. Two independent T-  
 255 DNA insertions in the *CPR5-1* gene were confirmed by sequencing the T-DNA flanking regions. In  
 256 the 3D-01842 line, T-DNA was inserted 1975 bp downstream of the ATG, in the fourth exon; in the  
 257 3A-06612 line, T-DNA was inserted 315 bp downstream of the ATG in the first intron (Figure 2A).  
 258 Phenotyping of these mutants was performed on a minimum of 12 plants homozygous for the  
 259 insertion. Ten weeks post-sowing, 3D-01842 and 3A-06612 non-inoculated mutants did not show any  
 260 visible differences in plant morphology or development compared to the wild-type controls (Figure  
 261 2B). The mutants inoculated with RYMV did not show any symptoms or growth reduction compared  
 262 to the non-inoculated controls, while wild-type plants expressed very clear yellowing and mottling

259 symptoms, a marked growth reduction or even growth arrest (Figure 2B and C). In addition, contrary  
260 to wild-type plants, mutants did not accumulate the virus according to the ELISA test findings. A total  
261 of 117 pseudo-T3 or F3 plants which segregated for one or another T-DNA insertion were analyzed.  
262 Except for one plant, a perfect co-segregation was observed between resistance and T-DNA insertions  
263 at the homozygous state (Table 4). This indicated that, in both *O. sativa* and *O. glaberrima*, altered  
264 forms of CPR5-1 lead to RYMV resistance.

265

266 **Table 4. Segregation of T-DNA and RYMV resistance in progenies.** A pseudo-T3 progeny  
267 derived from the 3D-01842 mutant, and F3 progenies derived from the 3A-06612 mutant were  
268 analyzed. The phenotype is indicated with “R” for resistance and “S” for susceptibility. The  
269 genotype is indicated with “WT” for plants without the T-DNA insertion, “Mut” for plants  
270 homozygous for the T-DNA insertion and “Htz” for plants heterozygous at the T-DNA insertion  
271 site.

| Mutant   | WT   | Htz  | Mut      |
|----------|------|------|----------|
| 3D-01842 | 12 S | 34 S | 15 R     |
| 3A-06612 | 14 S | 23 S | 18 R, 1S |

272

## 273 Discussion

274 The results of Orjuela et al. [13] strongly suggested that *CPR5-1* is the *RYMV2* gene, conferring  
275 resistance to RYMV. Here we validated this hypothesis using two independent T-DNA mutants in *O.*  
276 *sativa* and six different alleles leading to truncated forms of the protein in *O. glaberrima*. Although  
277 *Arabidopsis cpr5* mutants are known to be involved in biotic resistance [15], this is the first time that  
278 this gene has been described as a natural resistance gene in a crop species. In *Arabidopsis*, CPR5 is a  
279 transmembrane nucleoporin involved in the membrane ring of the nuclear pore complex [16]. Loss of  
280 function mutations permeabilize the nuclear pore and mediate the activation of cell cycle transcription  
281 factors, leading to defense gene expression. Constitutive resistance to several pathogens is one of the  
282 resulting phenotypes, but the mutant shows additional deleterious developmental phenotypes, such as  
283 reduced size [15] and seed yield [29], which would be incompatible with breeding strategies for biotic  
284 resistance in crops. Some of the six *RYMV2* resistance alleles identified in *O. glaberrima* were very  
285 probably null alleles as stop or frameshift mutations were found to occur far upstream, whereas the

284 *rymv2-R6* allele retained 93% of the wild-type protein sequence. Whether the protein completely loses  
285 its cellular function or not remains to be investigated. However, based on the homology with  
286 *Arabidopsis* [16], even the *rymv2-R6* allele would lack at least one of the transmembrane domains.  
287 Unexpectedly, no obvious deleterious phenotype appeared to be associated with these mutations. In  
288 addition, the detection of several null alleles that have evolved independently and have been  
289 maintained hardly supports a strong deleterious effect of *CPR5-1* knock-out. This could be explained  
290 by the presence of two *Arabidopsis CPR5* homologs in rice which may have partial functional  
291 redundancy. It is also possible that the functional homolog of *Arabidopsis CPR5* is *CPR5-2* and not  
292 *CPR5-1*. The cellular function of each copy will have to be further analyzed. However, our results  
293 suggest that the use of null or truncated *CPR5-1* alleles in rice breeding programs, either by  
294 introgression from *O. glaberrima* or by mutagenesis, would be an effective way to achieve RYMV  
295 resistance. Similar mutations may provide resistance in other pathosystems and allele mining in  
296 species that harbor two homologs of *Arabidopsis CPR5*, such as other cereal species, may help  
297 uncover new pathways of pathogen resistance.

298 Contrary to what was observed for accessions carrying *RYMV1* or *RYMV3* resistance alleles, no  
299 accessions carrying a *RYMV2* resistance allele showed resistance in 100% of the plants screened. This  
300 may have resulted from incomplete resistance or resistance-breaking events. The high rate of  
301 resistance-breakdown reported by Pinel-Galzi et al. [17] on the Tog7291 accession carrying the  
302 *rymv2-R1* resistance allele suggests that resistance-breaking events is the most likely hypothesis.  
303 Indeed, they reported resistance-breaking rates of up to 96% depending on isolates, while other results  
304 reported on *RYMV1* [30] and *RYMV3* [18] suggested less frequent resistance-breakdown on those  
305 genes.

306 This study also revealed new resistance sources without a resistance allele at the *RYMV2* locus. The  
307 *RYMV1* locus has been the focus of extensive analysis in recent years [12,14,31]. This larger scale  
308 study revealed two additional accessions carrying known resistance alleles but did not uncover any  
309 new resistance alleles. On the *NLR<sub>RYMV3</sub>* gene, we identified five additional accessions showing the  
310 K779R amino-acid substitution in the LRR region that was proposed as being responsible for a high

311 resistance phenotype [18]. These five accessions displayed high resistance to RYMV, which further  
312 strengthens the candidate status of the *NLR<sub>RYMV3</sub>* gene, and particularly the K779R mutation, but  
313 formal functional validation is still needed to confirm this. Two other haplotypes at *NLR<sub>RYMV3</sub>* were  
314 specific to resistant accessions but the corresponding accessions carried alleles on *RYMVI* and  
315 *RYMV2*, which would be sufficient to explain their high resistance level. Furthermore, the *NLR<sub>RYMV3-y</sub>*  
316 sequence variant was characterized by a truncated LRR domain, suggesting a loss of function, which  
317 is not consistent with a gain of resistance. We think it is likely that those two sequence variants do not  
318 confer resistance to RYMV but further genetic analyses would be necessary to confirm this.

319 In contrast, we did not find any convincing candidate resistance alleles on *RYMVI* and *RYMV2* genes  
320 among accessions from the 3000 Rice Genomes Project [25], which mostly includes *O. sativa*  
321 accessions. At the *RYMVI* locus, two rare mutations were identified in the MIF4G domain and would  
322 require further analysis. However, based on the predicted 3D structure of the MIF4G domain [14],  
323 they occurred downstream of the  $\alpha$ -helical hairpin that forms a protrusion where mutations known to  
324 be responsible for high resistance are located. We therefore do not consider these mutations as likely  
325 candidates for resistance. High variability was observed at the *NLR<sub>RYMV3</sub>* locus and a simple sequence  
326 analysis would not be sufficient to pinpoint mutations that may be involved in resistance. In  
327 particular, the K779R mutation, which is associated with resistance in *O. glaberrima*, has been  
328 detected in three *O. sativa* spp. *indica* accessions. However it is hard to speculate on their resistance,  
329 as these accessions were also characterized by 14 additional rare mutations in the LRR domain.

330 The probable absence of candidate resistance alleles on *RYMVI* and *RYMV2* within accessions of the  
331 3000 Rice Genomes Project—mainly *O. sativa*, as mentioned above—is in agreement with the scant  
332 resistance observed in this species based on phenotypic screening. Indeed, only two accessions with a  
333 high level of resistance to RYMV, like those described in this study, have been reported in *O. sativa*  
334 [10,11]. These two accessions, originating from East Africa, both carry the *rymv1-2* resistance allele.  
335 This result contrasted with the relatively high number of resistance alleles detected in *O. glaberrima*.  
336 Out of the 268 accessions of the collection used in this study, 40 highly resistant accessions were  
337 detected, which corresponded to approximately 15% of the collection. Yet this rate was probably  
338 overestimated because about ten accessions previously identified as resistant [12,32] were deliberately

339 included when the collection was set up [19]. The actual rate of resistant accessions in *O. glaberrima*  
340 is probably closer to 8%, which is the rate calculated on the basis of the 148 accessions newly  
341 evaluated in this study and for which we did not have any *a priori* knowledge. Still, this rate is very  
342 much higher than in *O. sativa*.

343 The diversity profiles on *RYMV1*, *RYMV2* and *NLR<sub>RYMV3</sub>* genes were contrasted. First, we observed a  
344 high number of mutations at the *NLR<sub>RYMV3</sub>* gene, with 35 non-synonymous mutations detected in the  
345 *O. glaberrima* collection. Such high variability was expected and has been widely documented for the  
346 *NLR* gene family, which is known to be hypermutagenic and frequently under balancing or  
347 diversifying selection as a result of the arms race between plants and pathogens [33–38]. Secondly,  
348 *RYMV1* and *RYMV2* presented lower variability, with five and ten non-synonymous mutations  
349 detected, respectively, in accordance with their central role in plant cells. Indeed, *RYMV1* codes for  
350 eIF(iso)4G-1 [14], a translation initiation factor that is part of the cell translation machinery, while the  
351 *Arabidopsis* gene homologous to *RYMV2* codes for a component of the nuclear pore complex. These  
352 two genes are therefore assumed to be under conservative selection. Interestingly, three out of five  
353 non-synonymous mutations in *RYMV1* and six out of ten in *RYMV2* were directly involved in the  
354 resistance phenotype. In a similar gene/pathogen interaction, the results of Charron et al. [39]  
355 provided evidence of diversifying selection on the eIF4E locus that would at least partially be driven  
356 by potyvirus-induced selection pressure. As RYMV emerged quite recently, in the mid-19th century  
357 [40,41], there has not been a long co-evolution between the virus and *O. glaberrima* that could have  
358 explained the allelic diversity observed at the resistance loci. However, selection pressure on these  
359 loci may have been exerted by other viruses using these exact plant factors.

360 The different resistance genes and alleles were positioned on the genetic diversity tree of the species  
361 proposed by Orjuela et al. [19] and on a map according to the geographical origin of the accessions.  
362 For all three resistance genes, accessions carrying the same resistance allele were generally showing a  
363 similar geographic origin (Figure 3) and were clustered on the genetic diversity tree (Additional file 2:  
364 Figure S1), as expected since *O. glaberrima* has geographically-based population structuring [42].  
365 More surprisingly, accessions with different *RYMV1* or *RYMV2* resistance alleles also appeared to be  
366 clustered, despite the independence of the mutations characterizing the alleles. Accessions with



367 *RYMV2* resistance alleles were located west of the Benin-Niger axis, while accessions with *RYMV1*  
368 resistance alleles were located east of this axis. *RYMV3* apparently did not fit this distribution pattern,  
369 but the low number of accessions limited the scope of these findings. Several hypotheses may explain  
370 the observed *RYMV1* and *RYMV2* structuring. First, both eIF(iso)4G and CPR5-1 – if confirmed as a  
371 nucleoporin – are part of large protein complexes. Their variability may have been driven by the  
372 genetic structuring of other members of the same complexes. Besides, the environmental conditions  
373 may have led to a difference in selection pressure on *RYMV1* and *RYMV2*, or members of the complex  
374 in which they participate. Accessions with *RYMV2* resistance alleles mainly originated from regions  
375 of historically dense rice cultivation, while accessions with *RYMV1* resistance alleles originated from  
376 regions where rice was more sparsely cultivated, according to Portères [43]. This axis is also  
377 compatible with the separation of two distinct genetic groups of RYMV isolates [40,41], one of which  
378 – the easternmost – includes hypervirulent isolates able to overcome most known resistance sources  
379 [30]. As underlined previously, the diversification of resistance genes under a selection pressure  
380 exerted by RYMV is quite improbable, but the opposite hypothesis has yet to be investigated, along  
381 with the impact of environmental conditions on both the virus and resistance gene diversity.  
382 Moreover, like *A. thaliana* *CPR5* [16], if *RYMV2* is a regulator of effector-triggered immunity and  
383 programmed cell death, it may confer resistance to several pathogens and could have evolved under  
384 selection pressure exerted by another pathogen. We would be unable to perform a more detailed  
385 population genetics analysis due to the limited number of resistant accessions available, but additional  
386 collections have been described [42,44] and should now be investigated.

387

## 388 **Conclusions**

389 Our results highlighted the allelic diversity in the three known resistance genes against RYMV. All 40  
390 *O. glaberrima* accessions identified as being highly resistant in this study carried at least one of the  
391 confirmed or candidate resistance alleles on *RYMV1*, *RYMV2* and *NLR<sub>RYMV3</sub>* (Table 2). This suggests  
392 that we have probably identified most of the resistance genes that occur in *O. glaberrima*, even  
393 though wild relative species, such as *Oryza barthii*, may also contain original resistance sources.



394 Sound knowledge on resistance genes against RYMV and their diversity is thus now available, as well  
395 as a good assessment of the frequency and molecular determinants of resistance-breakdown in  
396 controlled conditions [17,21,30]. This knowledge provides an opportunity to design strategies of  
397 resistance gene deployment that will optimize resistance durability. Previous results suggest that all  
398 three genes are effective against a large spectrum of RYMV isolates. However, the high capacity of  
399 some virus isolates to evolve and overcome resistance prompts breeders to manage the use of  
400 resistance genes by pyramiding, variety mixtures or temporal rotation, depending on the local virus  
401 diversity. So far, a single *RYMV1* resistance allele originating from *O. sativa* accessions has been  
402 transferred into high-yielding varieties [45,46] that are about to be deployed in the field. The use of  
403 additional resistance alleles or genes, and combinations, should be promoted to increase RYMV  
404 resistance sustainability.

405

## 406 **Methods**

### 407 **Plant material**

408 The *O. glaberrima* collection used in this study was described in Orjuela et al. [19]. This collection  
409 was jointly established by the French National Research Institute for Sustainable Development (IRD)  
410 and the Africa Rice Center and the accessions studied were selected for their current breeding impact  
411 and geographical distribution. Accessions identifiers (ID) of Orjuela et al. [19] are generally used,  
412 except for the CG14 reference accession or accessions previously characterized for RYMV resistance  
413 for which the previously used names were adopted [12,13]. Correspondences between the different ID  
414 are given in Additional file 1: Table S1.

415 T-DNA mutant lines were obtained from the Pohang University of Science and Technology, Pohang,  
416 Korea [27,28]. The 3D-01842 line was derived from the Hwayoung variety and the 3A-06612 line  
417 from the Dongjin variety. For the 3D-01842 line, a plant heterozygous for the T-DNA insertion in the  
418 *CPR5-1* gene was self-pollinated to develop pseudo-T2 and pseudo-T3 progenies that segregated for  
419 the insertion. As no plant heterozygous for the T-DNA insertion was available for the 3A-06612 line,

420 a plant homozygous for the insertion was crossed with the Dongjin variety and F1 hybrids were selfed  
421 to successively derive F2, and F3 progenies that segregated for the T-DNA insertion.

422

### 423 **Resistance evaluation**

424 Plants were grown in greenhouses and mechanically inoculated about 2 weeks after sowing with an  
425 RYMV isolate originating from Burkina Faso (BF1). The resistance evaluations were based on  
426 symptom observation and confirmed when necessary with DAS-ELISA to estimate the virus content  
427 in leaf samples harvested 2-3 weeks post-inoculation. Details on the inoculation and ELISA protocols  
428 were previously described in Pinel-Galzi et al. [47].

429

### 430 **Genomic data**

431 Genomic data on *O. glaberrima* accessions based on high coverage genomic sequencing (average  
432 35X, range 20-55X) were obtained from Cubry et al. [20]. The IRGSP 1.0 Nipponbare sequence [48]  
433 had been used as reference for mapping and SNP calling. The polymorphism database [49,50]  
434 included genomic data of 163 *O. glaberrima* and 83 *O. barthii* accessions. In a first step, the database  
435 was filtered for the 163 *O. glaberrima* accessions and for the ATG-stop codon regions of target genes.  
436 The ORGLA04G0147000.1, ORGLA01G0359000.1 and ORGLA11G0175800.1 gene models  
437 established on the CG14 accession [1], corresponding to Os04g42140.1, Os01g68970.1 and  
438 Os11g43700.1 gene models on the reference Nipponbare sequence, were considered for *RYMV1*,  
439 *CPR5-1* and *NLR<sub>RYMV3</sub>*, respectively. The target regions corresponded to positions 24,946,655-  
440 24,952,068 on chromosome 4 of the reference Nipponbare sequence for *RYMV1*, 40,071,092-  
441 40,073,727 on Nipponbare chromosome 1 for *CPR5-1* and 26,377,263-26,380,577 on Nipponbare  
442 chromosome 11 for *NLR<sub>RYMV3</sub>*. Only SNPs and indels that were polymorphic within *O. glaberrima*  
443 accessions were conserved. In a second step, polymorphisms were filtered with GATK 3.7  
444 VariantFiltration [51] using the following filters: QUAL<200, MQ0 >4 && MQ0/DP>0.1, DP<10,  
445 clusterSize 3 in clusterWindowSize 10, DP>20000. SNPs with more than 10% missing data or  
446 heterozygous in more than 10% accessions were filtered out, and genotypes defined based on a single

447 read were considered as missing data. Genomic data of the *O. glaberrima* CG14 [1] and Tog5681  
448 accessions [22] were included in the dataset. The haplotype of the RYMV-susceptible CG14  
449 accession was used as a reference to describe variants observed in the population.

450 Genomic data from the 3000 Rice Genomes Project [25] were retrieved from the Rice SNP-Seek  
451 database [24]. The database was filtered on the target regions indicated above for indels and non-  
452 synonymous SNPs from the base SNP set, which includes about 18 million SNPs. SNP effects were  
453 retrieved from the database, while indel effects were manually estimated.

454 The sequence variant nomenclature proposed by Den Dunnen et al. [52] was used to describe the  
455 mutations and their effects on CDS and proteins. Based on the results described in this paper or  
456 previously [12,14,18], dominant alleles were indicated with the first letter in upper case and recessive  
457 ones with the first letter in lower case; when there was no preferred hypothesis, allele names were  
458 written with all letters in upper case. For the *RYMV2* and *RYMV3* candidate genes, the different alleles  
459 were named depending on their association (R) or not (S) with RYMV resistance.

460

#### 461 **Sanger sequencing and molecular markers**

462 PCR amplifications were performed on leaf extracts or DNA, as described in Orjuela et al. [13].  
463 Primers were designed using Primer3 [53], except for the primers used for dCAPS markers, which  
464 were designed with the dCAPS Finder tool [54]. Primer sequences are provided in the Additional file  
465 2: Figure S2. Partial or complete Sanger sequencing of *RYMV1*, *CPR5-1* and *NLR<sub>RYMV3</sub>* genes was  
466 performed on PCR amplification fragments and subcontracted to Genewiz (Takeley, UK).

467 CAPS and dCAPS markers were designed on the *CPR5-1* gene to genotype polymorphic loci  
468 identified in *O. glaberrima* accessions. Marker characteristics are described in the Additional file 2:  
469 Figure S2 and Table S6.

470 The T-DNA segregation analysis was based on the amplification of a T-DNA-specific fragment and a  
471 gene-specific fragment involving a common primer. Primer sequences and positions are indicated in  
472 the Additional file 2: Figure S2.

473

## 474 **List of abbreviations**

- 475 CPR5 constitutive expression of pathogenesis-related protein-5
- 476 DAS-ELISA double antibody sandwich-enzyme-linked immunosorbent assay
- 477 dCAPS derived cleaved amplified polymorphic sequence
- 478 ID identifier
- 479 Indel small insertion/deletion
- 480 MIF4G middle domain of eukaryotic initiation factor 4G
- 481 LRR leucine-rich repeat
- 482 NLR nucleotide-binding domain and leucine-rich repeat containing domain
- 483 PCR polymerase chain reaction
- 484 RYMV *Rice yellow mosaic virus*
- 485 SNPs single nucleotide polymorphism

486

## 487 **Declarations**

### 488 **Ethics approval and consent to participate**

489 Not applicable

### 490 **Consent for publication**

491 Not applicable

### 492 **Availability of data and materials**

493 The *O. glaberrima* genomic dataset analysed in the current study are available in the IRD Gigwa  
494 repository, <https://gigwa.ird.fr/gigwa/>. All additional data generated in this study are included in the  
495 present article and its supplementary information files.

### 496 **Competing interests**

497 The authors declare that they have no competing interests.

### 498 **Funding**

499 This work was financially supported by the Global Rice Science Partnership (GriSP). The French  
500 *Ministère de l'Enseignement Supérieur et de la Recherche* provided a PhD grant to H. Pidon.

## 501 **Authors' contributions**

502 AG, HP and LA planned and designed the experiments, SC developed the populations, SC, HP and  
503 LA performed phenotyping, genotyping and sequencing, HP and LA analyzed the data and wrote the  
504 paper, AG and SC revised the paper.

## 505 **Acknowledgements**

506 We thank Christine Dubreuil-Tranchant and François Sabot for their help in the bioinformatics  
507 analysis, Gatean Maillot for technical help in T-DNA mutant characterization and Harold Chrestin for  
508 seed multiplication. We are also grateful to Denis Fargette, François Anthony, Mathias Lorieux and  
509 Nils Poulicard for helpful discussions. We thank Gynheung An for providing the T-DNA mutant  
510 lines.

511

512

## 513 **References**

- 514 1. Wang M, Yu Y, Haberer G, Marri PR, Fan C, Goicoechea JL, et al. The genome sequence of  
515 African rice (*Oryza glaberrima*) and evidence for independent domestication. *Nat Genet.*  
516 2014;46:982–8.
- 517 2. Meyer RS, Choi JY, Sanches M, Plessis A, Flowers JM, Amas J, et al. Domestication history  
518 and geographical adaptation inferred from a SNP map of African rice. *Nat Genet.*  
519 2016;48(9):1083–8.
- 520 3. Linares OF. African rice (*Oryza glaberrima*): History and future potential. *Proc Natl Acad Sci*  
521 *U S A.* 2002;99(25):16360–5.
- 522 4. Sarla N, Mallikarjuna Swamy BP. *Oryza glaberrima*: a source for the improvment of *Oryza*  
523 *sativa*. *Curr Sci.* 2005;89(6):955–63.
- 524 5. Jones MP, Dingkuhn M, Aluko GK, Semon M. Interspecific *Oryza sativa* L. x *O. glaberrima*  
525 Steud. progenies in upland rice improvement. *Euphytica.* 1997;94(2):237–46.
- 526 6. Heuer S, Miezán KM, Sie M, Gaye S. Increasing biodiversity of irrigated rice in Africa by  
527 interspecific crossing of *Oryza glaberrima* (Steud.) x *O. sativa indica* (L.). *Euphytica.*  
528 2003;132(1):31–40.
- 529 7. Kijima Y, Otsuka K, Sserunkuuma D. Assessing the impact of NERICA on income and  
530 poverty in central and western Uganda. *Agric Econ.* 2008;38(3):327–37.
- 531 8. Dibba L, Zeller M, Diagne A. The impact of new Rice for Africa (NERICA) adoption on  
532 household food security and health in the Gambia. *Food Secur.* 2017;9(5):929–44.

- 533 9. Kouassi NKK, N'Guessan P, Albar L, Fauquet CM, Brugidou C. Distribution and  
534 characterization of *Rice yellow mottle virus*: A threat to African farmers. *Plant Dis.*  
535 2005;89(2):124–33.
- 536 10. Ndjiondjop M-N, Albar L, Fargette D, Fauquet C, Ghesquière A. The genetic basis of high  
537 resistance to *Rice yellow mottle virus* (RYMV) in cultivars of two cultivated rice species. *Plant*  
538 *Dis.* 1999;83(10):931–5.
- 539 11. Rakotomalala M, Pinel-Galzi A, Albar L, Ghesquière A, Rabenantoandro Y, Ramavovololona  
540 P, et al. Resistance to *Rice yellow mottle virus* in rice germplasm in Madagascar. *Eur J Plant*  
541 *Pathol.* 2008;122(2):277–86.
- 542 12. Thiémélé D, Boissard A, Ndjiondjop M-N, Chéron S, Séré Y, Aké S, et al. Identification of a  
543 second major resistance gene to *Rice yellow mottle virus*, *RYMV2*, in the African cultivated  
544 rice species, *O. glaberrima*. *Theor Appl Genet.* 2010;121(1):169–79.
- 545 13. Orjuela J, Thiémélé D, Kolade O, Chéron S, Ghesquière A, Albar L. A recessive resistance to  
546 *Rice yellow mottle virus* is associated with a rice homolog of the *CPR5* gene, a regulator of  
547 active defense mechanisms. *Mol Plant Microbe Interact.* 2013;26(12):1455–63.
- 548 14. Albar L, Bangratz-Reyser M, Hebrard E, Ndjiondjop M-N, Jones M, Ghesquière A. Mutations  
549 in the eIF(iso)4G translation initiation factor confer high resistance of rice to *Rice yellow*  
550 *mottle virus*. *Plant J.* 2006;47(3):417–26.
- 551 15. Bowling S a, Clarke JD, Liu Y, Klessig DF, Dong X. The *cpr5* mutant of *Arabidopsis*  
552 expresses both NPR1-dependent and NPR1-independent resistance. *Plant Cell.*  
553 1997;9(9):1573–84.
- 554 16. Gu Y, Zebell SG, Liang Z, Wang S, Kang B-H, Dong X. Nuclear pore permeabilization is a  
555 convergent signaling event in effector-triggered immunity. *Cell.* 2016;166:1–13.
- 556 17. Pinel-Galzi A, Dubreuil-Tranchant C, Hébrard E, Mariac C, Ghesquière A, Albar L. Mutations  
557 in *Rice yellow mottle virus* polyprotein P2a involved in *RYMV2* gene resistance breakdown.  
558 *Front Plant Sci.* 2016;7:1–11.
- 559 18. Pidon H, Ghesquière A, Chéron S, Issaka S, Hébrard E, Sabot F, et al. Fine mapping of  
560 *RYMV3*: a new resistance gene to *Rice yellow mottle virus* from *Oryza glaberrima*. *Theor Appl*  
561 *Genet.* 2017;130(0):807–18.
- 562 19. Orjuela J, Sabot F, Chéron S, Vigouroux Y, Adam H, Chrestin H, et al. An extensive analysis  
563 of the African rice genetic diversity through a global genotyping. *Theor Appl Genet.*  
564 2014;127(10):2211–23.
- 565 20. Cubry P, Tranchant-Dubreuil C, Thuillet AC, Monat C, Ndjiondjop M-N, Labadie K, et al.  
566 The rise and fall of African rice cultivation revealed by analysis of 246 new genomes. *Curr*  
567 *Biol.* 2018;2274–82.
- 568 21. Traoré O, Pinel-Galzi A, Issaka S, Poulicard N, Aribi J, Aké S, et al. The adaptation of *Rice*  
569 *yellow mottle virus* to the eIF(iso)4G-mediated rice resistance. *Virology.* 2010;408(1):103–8.
- 570 22. Monat C, Pera B, Ndjiondjop MN, Sow M, Tranchant-Dubreuil C, Bastianelli L, et al. *De*  
571 *novo* assemblies of three *Oryza glaberrima* accessions provide first insights about pan-genome  
572 of African rices. *Genome Biol Evol.* 2017;9(1):1–6.

- 573 23. Nakamura K, Oshima T, Morimoto T, Ikeda S, Yoshikawa H, Shiwa Y, et al. Sequence-  
574 specific error profile of Illumina sequencers. *Nucleic Acids Res.* 2011;39(13):e90–e90.
- 575 24. Mansueto L, Fuentes RR, Borja FN, Detras J, Abriol-Santos JM, Chebotarov D, et al. Rice  
576 SNP-seek database update: new SNPs, indels, and queries. *Nucleic Acids Res.*  
577 2017;45(D1):D1075–81.
- 578 25. The 3000 rice genomes project. The 3,000 rice genomes project. *GigaScience.* 2014;3(1):7.
- 579 26. An S, Park S, Jeong D-H, Lee D-Y, Kang H-G, Yu J-H, et al. Generation and analysis of end  
580 sequence database for T-DNA tagging lines in rice. *Plant Physiol.* 2003;133(4):2040–7.
- 581 27. Jeon J-S, Lee S, Jung K-H, Jun S-H, Jeong D-H, Lee J, et al. T-DNA insertional mutagenesis  
582 for functional genomics in rice. *Plant J.* 2000;22(6):561–70.
- 583 28. Jeong D-H, An S, Park S, Kang H-G, Park G-G, Kim S-R, et al. Generation of a flanking  
584 sequence-tag database for activation-tagging lines in *japonica* rice. *Plant J.* 2006;45(1):123–  
585 32.
- 586 29. Heidel AJ, Clarke JD, Antonovics J, Dong X. Fitness Costs of Mutations affecting the  
587 systemic acquired resistance pathway in *Arabidopsis thaliana*. *Genetics.* 2004;168(4):2197–  
588 206.
- 589 30. Hebrard E, Pinel-Galzi A, Oludare A, Poulicard N, Aribi J, Fabre S, et al. Identification of a  
590 hypervirulent pathotype of *Rice yellow mottle virus*: A threat to genetic resistance deployment  
591 in West-Central Africa. *Phytopathology.* 2018;108(2):299–307.
- 592 31. Agnoun Y, Yelome I, Sie M, Albar L, Ghesquière A, Silue D. Resistance of selected *Oryza*  
593 *glaberrima* landraces and their intra-specific breeding lines to Beninese *Rice yellow mottle*  
594 *virus* isolates. *Crop Prot.* 2019;119:172–6.
- 595 32. Thottappilly GG, Rossel HW. Evaluation of resistance to *Rice yellow mottle virus* in *Oryza*  
596 species. *Indian J Virol.* 1993;9(1):65–73.
- 597 33. McDowell JM, Simon SA. Recent insights into R gene evolution. *Mol Plant Pathol.*  
598 2006;7(5):437–48.
- 599 34. Guo YL, Fitz J, Schneeberger K, Ossowski S, Cao J, Weigel D. Genome-wide comparison of  
600 nucleotide-binding site-leucine-rich repeat-encoding genes in *Arabidopsis*. *Plant Physiol.*  
601 2011;157(2):757–69.
- 602 35. Zhang Y, Guo M, Shen J, Song X, Dong S, Wen Y, et al. Comparative genomics analysis in  
603 grass species reveals two distinct evolutionary strategies adopted by R genes. *Sci Rep.*  
604 2019;9(1):1–10.
- 605 36. Karasov TL, Horton MW, Bergelson J. Genomic variability as a driver of plant-pathogen  
606 coevolution? *Curr Opin Plant Biol.* 2014.
- 607 37. Mauricio R, Stahl EA, Korves T, Tian D, Kreitman M, Bergelson J. Natural selection for  
608 polymorphism in the disease resistance gene *Rps2* of *Arabidopsis thaliana*. *Genetics.*  
609 2003;163(2):735–46.
- 610 38. Tian D, Araki H, Stahl E, Bergelson J, Kreitman M. Signature of balancing selection in  
611 *Arabidopsis*. *Proc Natl Acad Sci U S A.* 2002;99(17):11525–11530.



- 612 39. Charron C, Nicolai M, Gallois J-L, Robaglia C, Moury B, Palloix A, et al. Natural variation  
613 and functional analyses provide evidence for co-evolution between plant eIF4E and potyviral  
614 VPg. *Plant J.* 2008;54(1):56–68.
- 615 40. Pinel-Galzi A, Traoré O, Séré Y, Hébrard E, Fargette D. The biogeography of viral  
616 emergence: *Rice yellow mottle virus* as a case study. *Curr Opin Virol.* 2015;10:7–13.
- 617 41. Trovão NS, Baele G, Vrancken B, Bielejec F, Suchard MA, Fargette D, et al. Host ecology  
618 determines the dispersal patterns of a plant virus. *Virus Evol.* 2015;1(1):vev016.
- 619 42. Choi JY, Zaidem M, Gutaker R, Dorph K, Singh RK, Purugganan MD. The complex  
620 geography of domestication of the African rice *Oryza glaberrima*. *PLoS Genetics.* 2019;15: 1–  
621 34.
- 622 43. Portères R. Berceaux agricoles primaires sur le continent africain. *J Afr Hist.* 1962;3(2):195–  
623 210.
- 624 44. Ndjiondjop M-N, Semagn K, Gouda AC, Kpeki SB, Dro Tia D, Sow M, et al. Genetic  
625 variation and population structure of *Oryza glaberrima* and development of a mini-core  
626 collection using DArTseq. *Front Plant Sci.* 2017;8:1748.
- 627 45. Bouet A, Amancho AN, Kouassi N, Anguete K. Comportement de nouvelles lignées  
628 isogéniques de riz irrigué dotées du gène de résistance (*rymv1*) au RYMV en Afrique de  
629 l’ouest : situation en Côte d’Ivoire. *Int J Biol Chem Sci.* 2013 Oct 25;7(3):1221.
- 630 46. Ndjiondjop MN, Albar L, Sow M, Yao N, Djedatin G, Thiemélé D, et al. Integration of  
631 molecular markers in rice improvement: a case study on resistance to Rice yellow mottle virus.  
632 In: Wopereis M, Johnson D, Ahmadi N, Tollens E, Jalloh A, editors. *Realizing Africa’s rice*  
633 *promise.* CABI; 2013. p. 161–72.
- 634 47. Pinel-Galzi A, Hébrard E, Traoré O, Silué D, Albar L. Protocol for RYMV Inoculation and  
635 resistance evaluation in rice seedlings. *Bio-protocol.* 2018;8(11):1–13.
- 636 48. Kawahara Y, de la Bastide M, Hamilton JP, Kanamori H, McCombie WR, Ouyang S, et al.  
637 Improvement of the *Oryza sativa* Nipponbare reference genome using next generation  
638 sequence and optical map data. *Rice (N Y).* 2013;6(1):4.
- 639 49. Gigwa Release v2.2. <https://gigwa.ird.fr/gigwa/>. Accessed 9 September, 2019.
- 640 50. Sempéré G, Pétel A, Rouard M, Frouin J, Hueber Y, De Bellis F, Larmande P. Gigwa v2—  
641 Extended and improved genotype investigator. *GigaScience.* 2019;8(5):giz051.
- 642 51. McKenna A, Hanna M, Banks E, Sivachenko A, Cibulskis K, Kernytsky A, et al. The Genome  
643 Analysis Toolkit: A MapReduce framework for analyzing next-generation DNA sequencing  
644 data. *Cold Spring Harbor Laboratory Press Resource.* 2010;20:254–60.
- 645 52. den Dunnen JT, Dalgleish R, Maglott DR, Hart RK, Greenblatt MS, McGowan-Jordan J, et al.  
646 HGVS recommendations for the description of sequence variants: 2016 Update. *Hum Mutat.*  
647 2016;37(6):564–9.
- 648 53. Rozen S, Skaletsky H. Primer3 on the WWW for general users and for biologist programmers.  
649 *Bioinformatics Methods and Protocols.* In: Misener S, Krawetz SA, editors. Totowa, NJ:  
650 Humana Press; 1999. p. 365–86.



651 54. Neff MM, Turk E, Kalishman M. Web-based primer design for single nucleotide  
652 polymorphism analysis. Trends Genet. 2002;18(12):613–5.  
653

## 654 **Figure captions**

655

### 656 **Figure 1. Variants of resistance genes or candidates at the protein level.**

657 For *RYMVI* (A), the allele names cited in Albar et al. [14] and Thiemele et al. [12] are used, but an  
658 additional protein variant observed in susceptible accessions was given the name “*RymvI-I-Og2*”, and  
659 for greater clarity the allele named “*RymvI-I-Og*” in [12] was referred to as “*RymvI-I-OgI*”. For the  
660 *RYMV2* (B) and *RYMV3* (C) candidate genes, the different alleles were named according to their  
661 association (R) or not (S) with RYMV resistance. The CG14 allele was the reference allele.  
662 Polymorphisms associated with resistance are indicated in red, whereas those which are not are in  
663 green. Important conserved domains are indicated as colored frames. The number of accessions  
664 carrying each allele is indicated on the right of the figure, with a distinction between accessions from  
665 the set of 165 fully sequenced accessions (without brackets), and accessions from the nine additional  
666 resistant accessions (in brackets). The total number of accessions sometimes differed between genes  
667 due to missing data, resulting in undefined alleles.

668

669 **Figure 2. Characterization of T-DNA mutant lines 3D-01842 and 3A-06612.** (A) Structure of the  
670 *CPR5-I* gene and positions of T-DNA, inserted 315 bp downstream of the ATG in the 3A-06612 line  
671 and 1975 bp downstream of the ATG in the 3D-0184 line. Exons are represented as black boxes and  
672 introns as black lines. (B) Phenotype of wild-type controls and the 3D-0184 mutant on 10-week old  
673 non-inoculated plants, and 8 weeks after RYMV inoculation on inoculated plants, at the whole plant  
674 level. (C) Yellowing of leaves of wild-type controls and the 3D-0184 mutant 2 weeks post-inoculation  
675 with RYMV.

676

677 **Figure 3. Geographical origin of accessions carrying resistance alleles on *RYMV1*, *RYMV2* and**  
678 ***NLR<sub>RYMV3</sub>* genes.** The geographical origins of the accessions were obtained from Cubry et al. [20].  
679 Accessions for which GPS coordinates were available are represented by colored points. In each  
680 country, the total number of accessions carrying a specific allele (with or without GPS coordinates) is  
681 indicated as a number.

## 682 **Additional file captions**

683

### 684 **Additional file 1 (.xls)**

685 **Additional file 1: Table S1. ID, phenotype and genotype of accessions characterized for RYMV**  
686 **resistance.** Resistance to RYMV was evaluated after mechanical inoculation of the BF1 isolate in this  
687 study or in previous studies [12,13]. Alleles on resistance genes or candidates refer to the results  
688 presented in the Additional File 1: Table S2, Table S3, Table S4 or in previous studies [12].

689

690 **Additional file 1: Table S2. Genotype on the *RYMV1* resistance gene.** Only positions where  
691 polymorphisms were detected in the *O. glaberrima* collection analyzed in Cubry et al. [20] were  
692 included. Nucleotide positions refer to the IRGSP1.0 reference sequence of the *O. sativa* Nipponbare  
693 accession [46] that was used as mapping reference. The effect of the mutations are based on the  
694 ORGLA04G0147000.1 gene model established on the *O. glaberrima* CG14 accession [1]. Mutations  
695 are described according to the nomenclature proposed by Den Dunnen et al. [48], except that  
696 synonymous mutations and mutations occurring in an intron are denoted “syn” and “intron”,  
697 respectively. Different variants at the protein level were considered as different alleles. Names for  
698 resistance alleles were previously attributed by Albar et al. [14] and Thiemele et al. [12], but an  
699 additional protein variant observed in susceptible accessions was given the name “*Rymv1-1-Og2*”, and  
700 for greater clarity the allele named “*Rymv1-1-Og*” in [12] was referred to as “*Rymv1-1-Og1*”.

701

702 **Additional file 1: Table S3. Genotype on the *CPR5-1* gene, candidate for *RYMV2*.** Only positions  
703 were polymorphisms were detected in the *O. glaberrima* collection analyzed in Cubry et al. [20] were  
704 included. Nucleotide positions referred to the IRGSP1.0 reference sequence of the *O. sativa*  
705 Nipponbare accession [46] that was used as mapping reference. The effects of the mutations are based  
706 on the ORGLA01G0359000.1 gene model established on the *O. glaberrima* CG14 accession [1].  
707 Mutations are described according to the nomenclature proposed by Den Dunnen et al. [48], except  
708 that synonymous mutations and mutations occurring in an intron are noted “syn” and “intron”,

709 respectively. Different variants at the protein level were considered as different alleles. The allele  
710 names were chosen to distinguish protein variants associated or not with RYMV resistance.

711

712 **Additional file 1: Table S4. Genotype on the *NLR<sub>RYMV3</sub>* gene, candidate for *RYMV3*.** Only  
713 positions were polymorphisms were detected in to the *O. glaberrima* collection analyzed in Cubry et  
714 al. (2018) were included. Nucleotide positions refer to the IRGSP1.0 reference sequence of the *O.*  
715 *sativa* Nipponbare accession [46] that was used as mapping reference. The effects of the mutations  
716 are based on the ORGLA11G0175800.1 gene model established on the *O. glaberrima* CG14  
717 accession (Wang et al., 2014). Mutations are described according to the nomenclature proposed by  
718 Den Dunnen et al. [48], except that synonymous mutations and mutations occurring in an intron are  
719 noted “syn” and “intron”, respectively. Different variants at the protein level were considered as  
720 different alleles. The allele names were chosen to distinguish protein variants associated or not with  
721 RYMV resistance.

722

723 **Additional file 1: Table S5. Diversity on RYMV resistance genes or candidates in accessions**  
724 **from the 3000 Rice Genomes Project [25].** Only non-synonymous SNPs from the base SNPs set are  
725 reported here. SNP effects were retrieved from the SNP-Seek database [24] and indels effects were  
726 evaluated manually. The effects of mutations on CDS and proteins are based on the Os04g42140.1  
727 and Os01g68970.1 gene models established on the Nipponbare IRGSP1.0 sequence [46], for *RYMV1*  
728 and *CPR5-1*, respectively. For *NLR<sub>RYMV3</sub>*, the CDS is based on the Os11g43700.1 gene mode,  
729 except that the ATG codon was shifted from 180 nucleotides downstream of the original starting  
730 codon to best fit the corresponding CDS of the ORGLA11G0175800.1 gene model established on  
731 CG14 reference sequence. Effects on the CDS and protein were thus adapted. Frequency refers to the  
732 percentage of the alternate variant in the complete set of accessions. Mutations located in the PFAM  
733 domains MA3, MIF4G and LRR and in the HMM Panther hit LRR are indicated.

734

735 **Additional file 2 (.pdf)**

736 **Additional file 2: Figure S1.** Positions of accessions with resistance alleles of RYMV1, RYMV2 and  
737 NLRRYMV3 genes on the genetic diversity tree. Susceptible accessions are colored in dark grey and  
738 accessions not evaluated for resistance in light grey. Adapted from the genetic tree of Orjuela et al.  
739 [19].

740 **Additional file 2: Figure S2.** Characteristics of primers and amplified fragments for markers or  
741 Sanger sequencing. Genes are represented as grey boxes for exons and grey lines for introns. Primers  
742 are represented as triangles and the numbers below the triangle refer to the corresponding sequences.  
743 (a, b, c) Blue traits represent fragments that were amplified and then sequenced with the primers  
744 colored in red. (c) Amplification fragments corresponding to the CAPS or dCAPS markers designed

745 on the CPR5-1 gene are represented as green traits. Additional information on these markers is  
746 provided in Additional file 2: Table S6. (d) Position of T-DNA insertions in the CPR5-1 gene in lines  
747 3A-06612 and 3D-01842 are indicated. The T-DNA-specific and gene-specific primers used for  
748 sequencing the T-DNA flanking site and genotyping for the presence/absence of insertions are  
749 indicated in brown and blue, respectively.

750 **Additional file 2: Table S6.** Characteristics of CAPS and dCAPS markers. Marker names indicate  
751 whether there are CAPS or dCAPS markers and which alleles of the CPR5-1 gene they target. The  
752 bracketed number before the primer sequences refer to the reference of primers in Additional file 2:  
753 Figure S2. The size of the fragments expected in plants with the reference haplotype of CG14 (WT) or  
754 the alternate haplotypes (R) are indicated, except fragments below 30 bp that are uneasily detected by  
755 agarose electrophoresis. The CAPS-CPR5-1-R1 marker had already been described in Orjuela et al.  
756 [13].

757

758

759

760

761

762

763

764

765

766

767

768

769

770

771

772

773

774

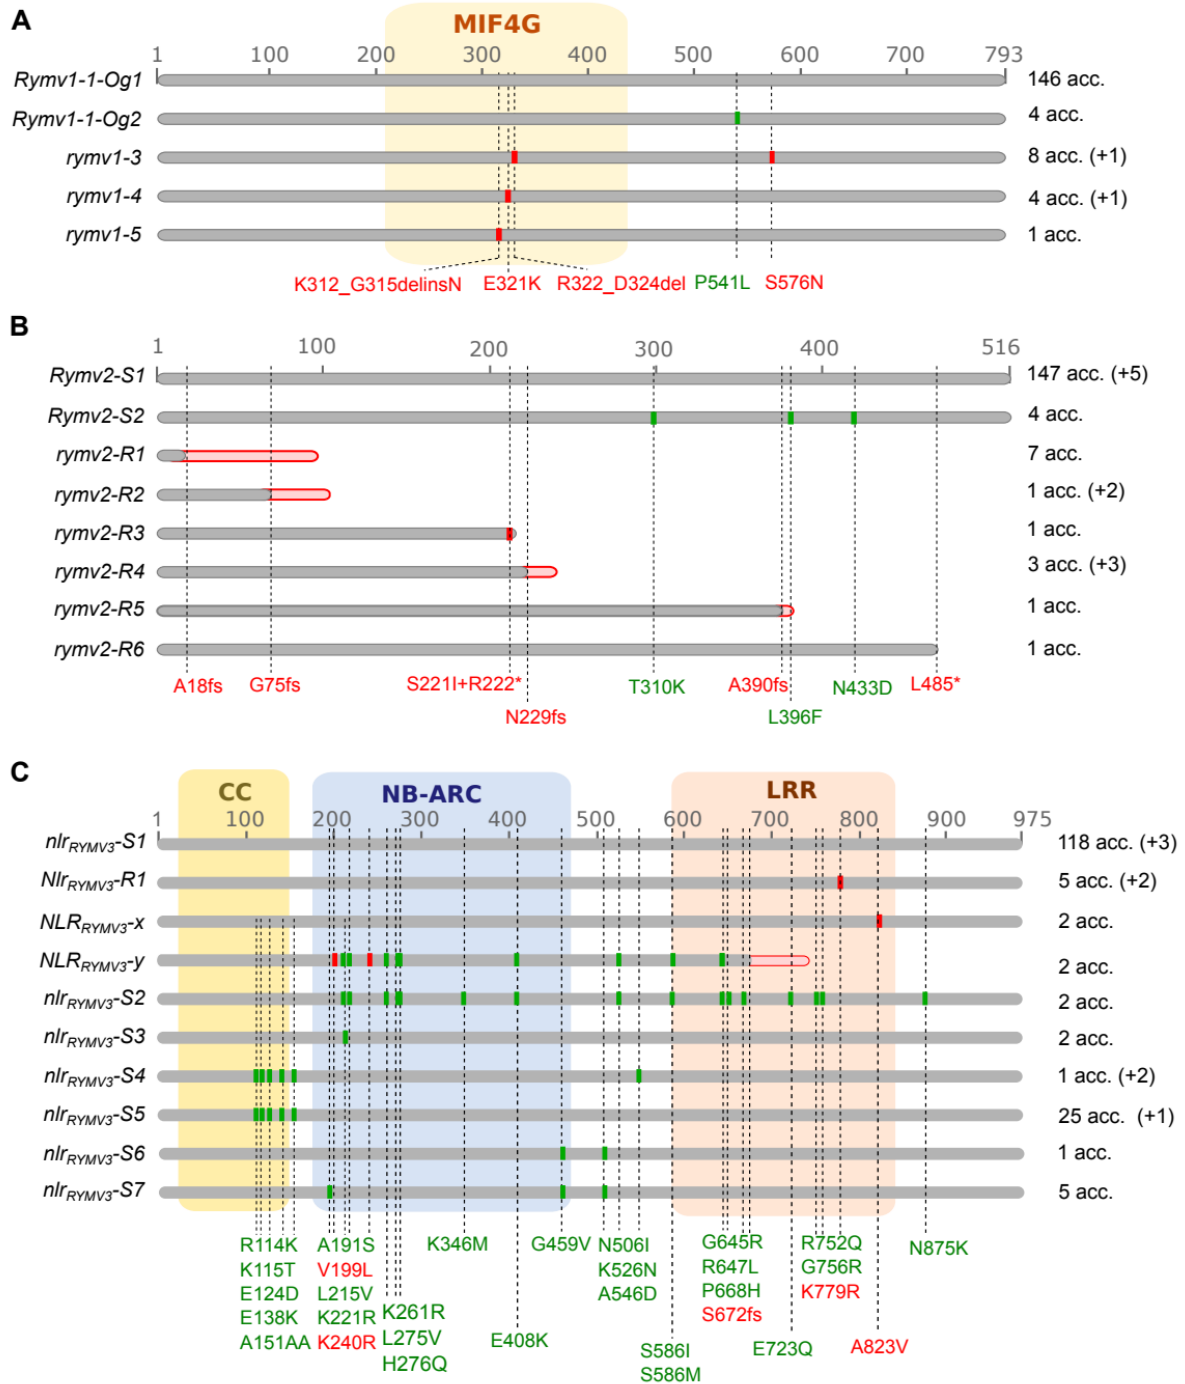

775 **Figure 1**

776

777

778

779

780

781

782

783

784

785

786

787

788

789

790

791

792

793

794

795

796

797

798

799 **Figure 2**

800

801

802

803

804

805

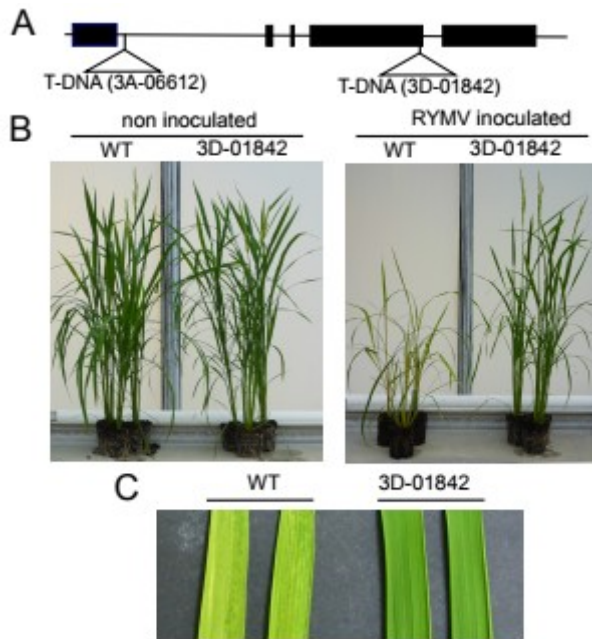

**Figure 2**

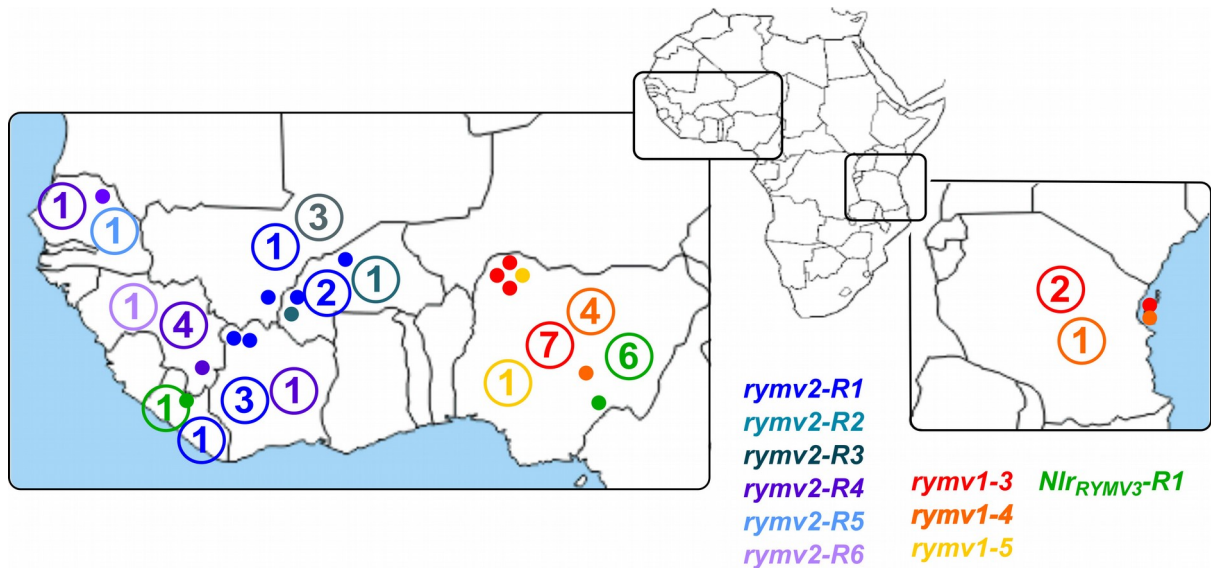

806 **Figure 3**
